# Supplementary material for: New sources of genipin-rich substances for crosslinking future manufactured bio-based materials
Source: Royal Society of Chemistry journal article supplement (doi:10.1039/d3su00303e), 2023-11-09
Supplement: d3su00303e1.pdf [file d3su00303e1.pdf]

## *Supplementary Information*

# New sources of genipin-rich substances for crosslinking future manufactured bio-based materials

Liliana B. Hurtado Colmenares,<sup>a,b</sup> Maryam Nejati,<sup>c</sup> Yuan Fang,<sup>d</sup> Boyang Guo,<sup>e</sup> Amparo Jiménez-Quero,<sup>c</sup> Antonio J. Capezza,<sup>\*,b</sup> and Marcos A. Sabino<sup>\*,a</sup>

<sup>a</sup> Department. of Chemistry, B5IDA research group, Simon Bolivar University, Caracas 89000, Venezuela.

<sup>b</sup> Department of Fibre and Polymer Technology, Polymeric Materials Division, School of Engineering Sciences in Chemistry, Biotechnology and Health. KTH Royal Institute of Technology, Stockholm 10044, Sweden.

<sup>c</sup> Division of Glycoscience, Department of Chemistry, School of Engineering Sciences in Chemistry, Biotechnology and Health, KTH Royal Institute of Technology, AlbaNova University Centre, SE-106 91, Stockholm, Sweden.

<sup>d</sup> Department of Materials Science and Engineering, Uppsala University, Box 35, 751 03 Uppsala, Sweden.

<sup>e</sup> Department of Chemistry, Ångström Laboratory, Molecular Biomimetics; Microbial Chemistry, Uppsala University, Box 523, 751 20 Uppsala, Sweden.

### **Corresponding Author**

Antonio J. Capezza [ajcv@kth.se](mailto:ajcv@kth.se) ; Marcos A. Sabino [msabino@usb.ve](mailto:msabino@usb.ve)

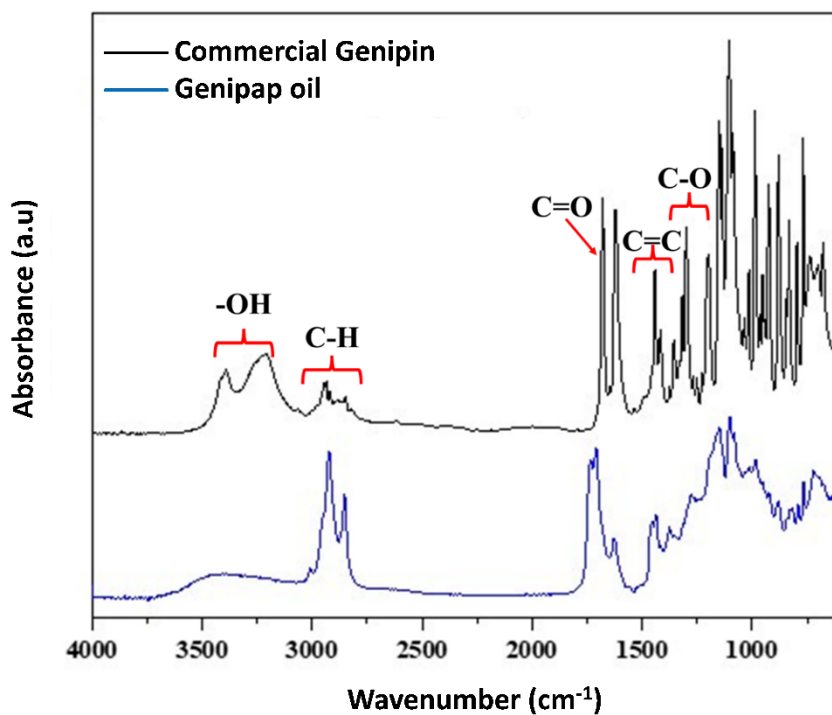

**Figure S1.** FTIR spectrum of the caruto oil from the Venezuelan caruto compared with the commercial genipin in the region of 4000-500  $\text{cm}^{-1}$ .

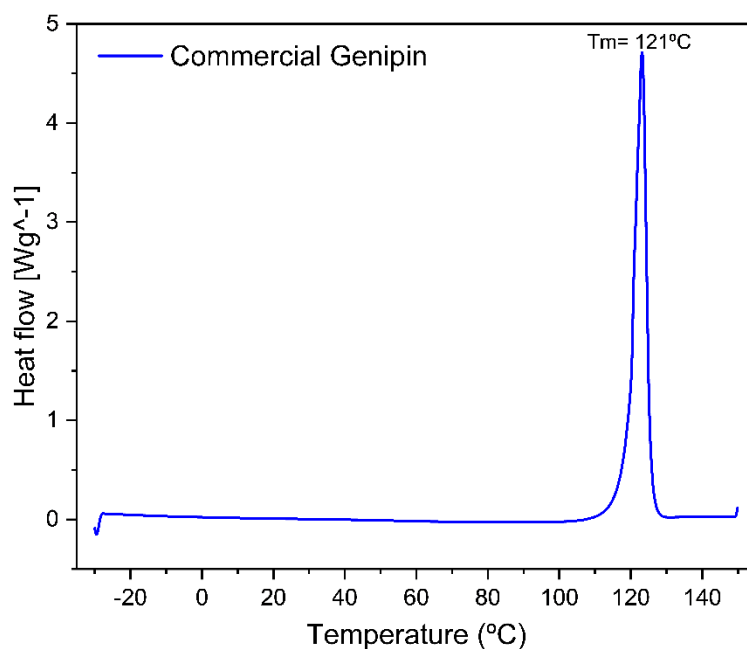

**Figure S2.** DSC of commercial genipin.

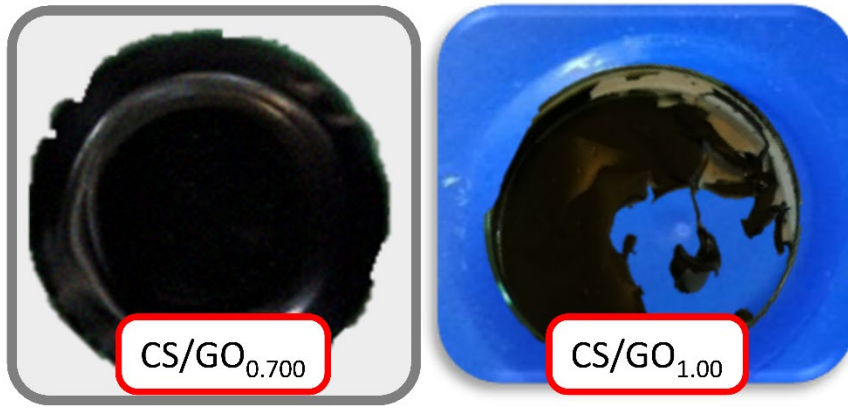

**Figure S3.** Appearance of the chitosan film obtained by solvent casting.

---

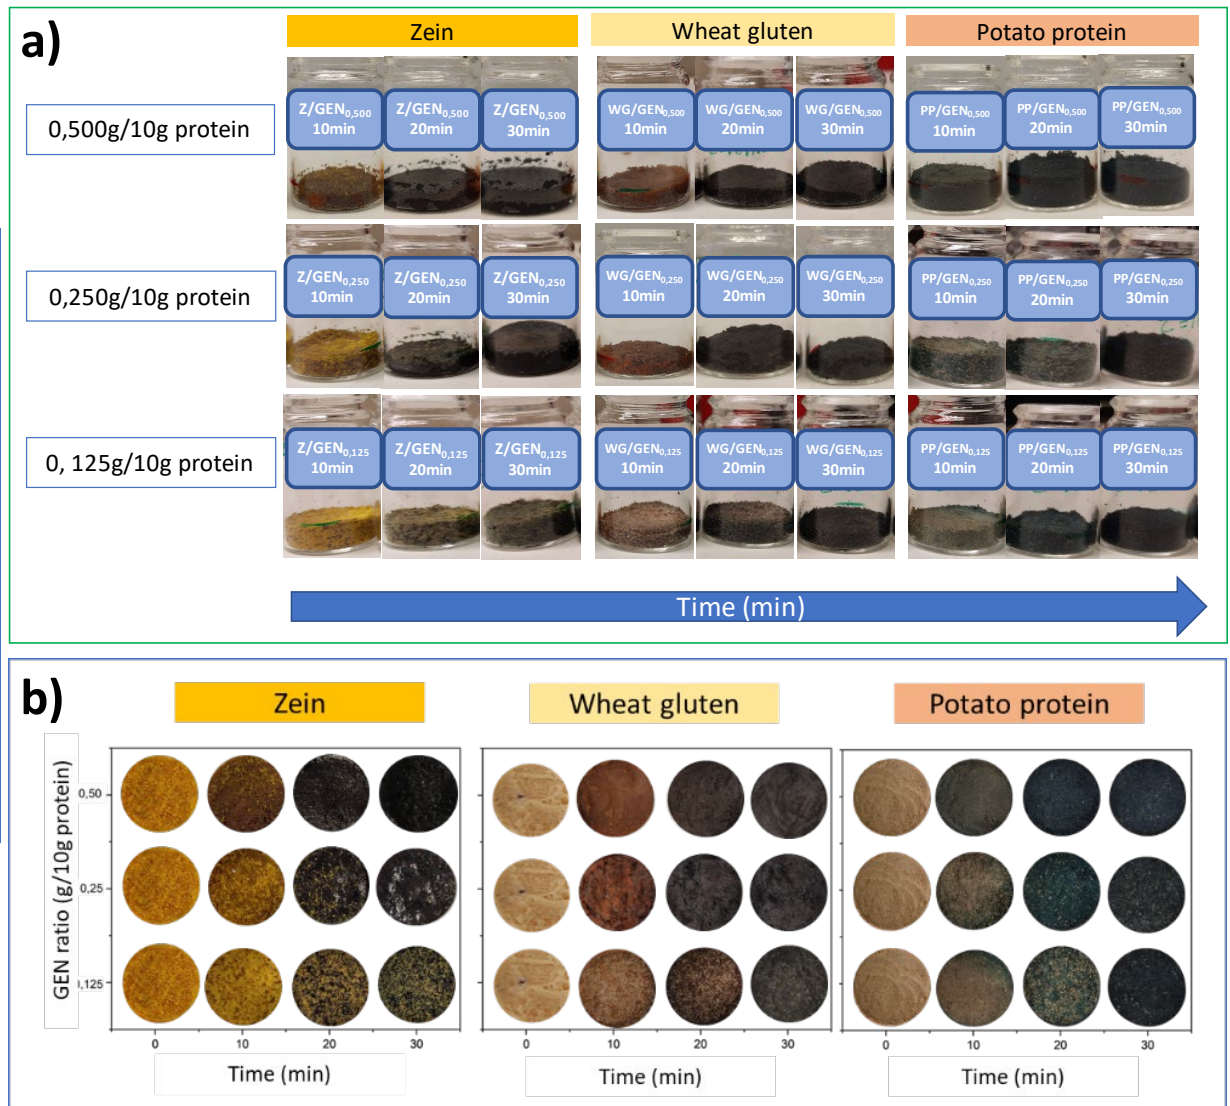

**Figure S4.** a) Appearance of protein foams prepared at 110°C over the time in the oven and their b) color change.

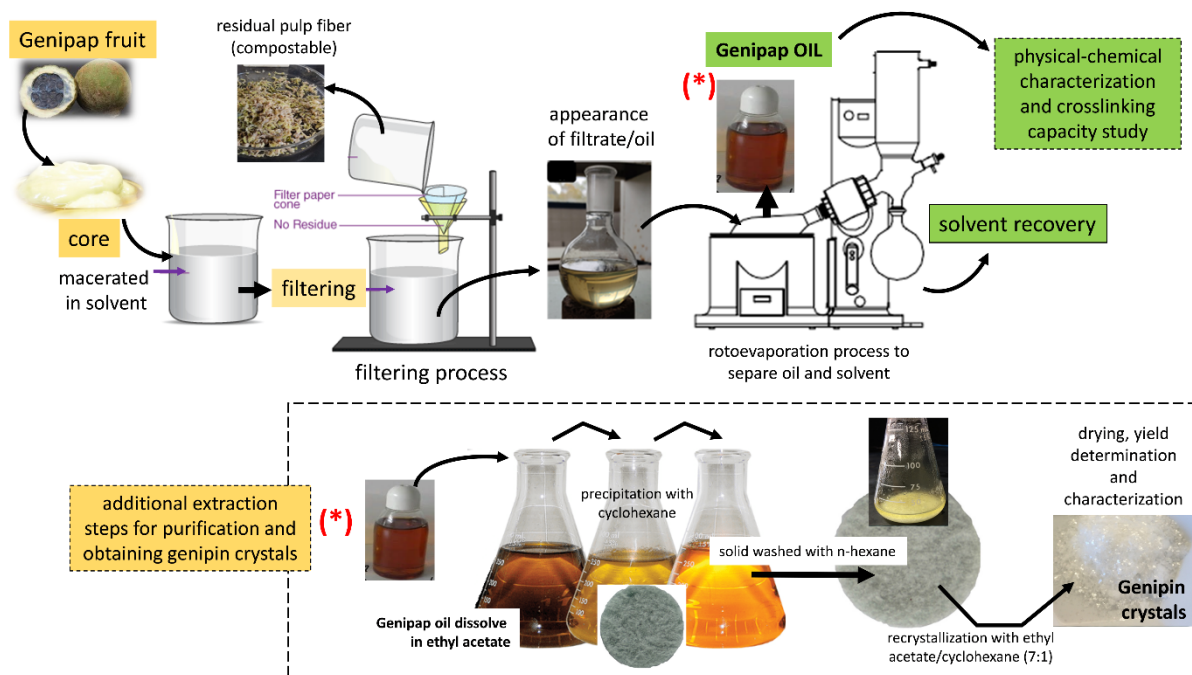

**Figure S5.** Diagram of the oil extraction and purification of genipin.

**Table S1.** The monosaccharide analysis results from TFA (trifluoroacetic acid) hydrolysis, tested on the extracted genipap oil, core, and peel of the genipap fruit. ND: not detected

| Monosaccharides  | Peel         | Core           | Oil         |
|------------------|--------------|----------------|-------------|
| Fucose           | 0.07 ± 0.12  | ND             | ND          |
| Arabinose        | 35.31 ± 2.28 | 30.52 ± 2.65   | 0.33 ± 0.37 |
| Rhamnose         | 5.61 ± 0.36  | 4.24 ± 0.43    | 0.16 ± 0.28 |
| Galactose        | 39.11 ± 2.18 | 33.46 ± 2.79   | 0.40 ± 0.25 |
| Glucose          | 66.25 ± 2.58 | 207.12 ± 21.06 | 2.90 ± 0.56 |
| Xylose           | 99.46 ± 7.27 | 36.07 ± 5.05   | ND          |
| Mannose          | 4.51 ± 0.54  | 4.21 ± 1.01    | ND          |
| Glucuronic acid  | 33.73 ± 2.17 | 21.35 ± 2.10   | 4.15 ± 3.93 |
| Galactronic acid | 1.86 ± 0.08  | 2.27 ± 0.14    | 0.61 ± 0.27 |

**Table S2.** Quantitative measurements of phenolic compounds through saponification of the samples and identification through HPLC-UV-Vis. The data is reported in µg/mg biomass units. ND: not detected

| Sample | Coumaric     |             |              | Cinnamic     |             | Total       |
|--------|--------------|-------------|--------------|--------------|-------------|-------------|
|        | Caffeic acid | acid        | Ferulic acid | Sinapic acid | acid        |             |
| Peel   | 0.11 ± 0.00  | 0.17 ± 0.01 | 0.31 ± 0.01  | ND           | 0.05 ± 0.00 | 0.63 ± 0.03 |
| Core   | 0.10 ± 0.01  | 0.03 ± 0.00 | 0.23 ± 0.01  | ND           | 0.09 ± 0.01 | 0.44 ± 0.03 |
| Oil    | 0.24 ± 0.01  | 0.05 ± 0.01 | 0.87 ± 0.07  | ND           | 0.11 ± 0.01 | 1.27 ± 0.09 |

**Table S3.** Characteristics of crosslinked structures with Genipap oil at different processing conditions.

| Sample <sup>a</sup>         | Polymer        | GO xg/10g polymer | Type of processing | Temperature (°C) | Color change | Structure formation | Retains the shape of the mold |
|-----------------------------|----------------|-------------------|--------------------|------------------|--------------|---------------------|-------------------------------|
| CS                          | Chitosan       | 0                 | Solvent casting    | 25               | No           | Yes                 | Partial                       |
| CS/GO <sub>0.100</sub>      |                | 0.100             |                    | 25               | Yes          | Yes                 | Partial                       |
| CS/GO <sub>0.500</sub>      |                | 0.500             |                    | 25               | Yes          | Yes                 | Complete                      |
| Z                           | Zein           | 0                 | Dry                | 100              | No           | Yes                 | Partial                       |
| Z/GO <sub>0.125</sub>       |                |                   |                    | 110              | No           | Yes                 | Partial                       |
|                             |                | 100               |                    | Yes              | Yes          | Complete            |                               |
| Z/GO <sub>0.250</sub>       |                | 110               |                    | Yes              | Yes          | Complete            |                               |
|                             |                | 100               |                    | Yes              | Yes          | Complete            |                               |
| Z/GO <sub>0.500</sub>       |                | 110               |                    | Yes              | Yes          | Complete            |                               |
|                             | 110            | Yes               | Yes                | Complete         |              |                     |                               |
| WG                          | Wheat gluten   | 0                 | Dry                | 100              | No           | Yes                 | Partial                       |
| WG/GO <sub>0.125</sub>      |                |                   |                    | 110              | No           | Yes                 | Partial                       |
|                             |                | 100               |                    | Yes              | Yes          | Complete            |                               |
| WG/GO <sub>0.250</sub>      |                | 110               |                    | Yes              | Yes          | Complete            |                               |
|                             |                | 100               |                    | Yes              | Yes          | Complete            |                               |
| WG/GO <sub>0.500</sub>      |                | 110               |                    | Yes              | Yes          | No                  |                               |
|                             | 110            | Yes               | Yes                | No               |              |                     |                               |
| PP                          | Potato protein | 0                 | Dry                | 100              | No           | No                  | No                            |
| PP/GO <sub>0.125</sub>      |                |                   |                    | 110              | No           | No                  | No                            |
|                             |                | 100               |                    | Yes              | No           | No                  |                               |
| PP/GO <sub>0.250</sub>      |                | 100               |                    | Yes              | No           | No                  |                               |
|                             |                | 110               |                    | Yes              | No           | No                  |                               |
| PP/GO <sub>0.500</sub>      |                | 100               |                    | Yes              | No           | No                  |                               |
|                             | 110            | Yes               | No                 | No               |              |                     |                               |
| 75Z/25WG                    | Z+WG           | 0                 | Hot press          | 110              | No           | Yes                 | Complete                      |
| 75Z/25WG <sub>GO</sub>      |                | 0.250             |                    |                  | Yes          | Yes                 | Complete                      |
| 60Z/25WG/15PP               | Z+WG+PP        | 0                 | Hot press          | 110              | No           | Yes                 | Complete                      |
| 60Z/25WG/15PP <sub>GO</sub> |                | 0.250             |                    |                  | Yes          | Yes                 | Complete                      |
| 25Z/25WG/50PP               |                | 0                 |                    |                  | No           | Yes                 | Complete                      |
| 25Z/25WG/50PP <sub>GO</sub> |                | 0.250             |                    |                  | Yes          | Yes                 | Complete                      |

<sup>a</sup> All samples with commercial genipin showed color change and retained the shape of the mold except the samples with single proteins.

**Table S4.** Solvents used in the extraction of the caruto oil and the purification of genipin from the oil, according to the Green Chemistry principles.<sup>1</sup>

| Solvent       | Safety score | Health score | Environment score | Ranking for default | Raking after discussion | Use                        |
|---------------|--------------|--------------|-------------------|---------------------|-------------------------|----------------------------|
| Chloroform    | 2            | 7            | 5                 | Problematic         | Highly Hazardous        | oil extraction             |
| Acetone       | 5            | 3            | 5                 | Problematic         | Recommended             | GEN extraction             |
| Ethyl acetate | 5            | 3            | 3                 | Recommended         | Recommended             | GEN extraction             |
| Cyclohexane   | 6            | 3            | 7                 | Problematic         | Problematic             | GEN extraction             |
| Hexane        | 8            | 7            | 7                 | Hazardous           | Hazardous               | GEN extraction             |
| Acetic acid   | 3            | 7            | 3                 | Problematic         | Problematic             | Chitosan films preparation |

| Classification | Score |
|----------------|-------|
| Recommended    | 1-3   |
| Problematic    | 4-6   |
| Hazardous      | 7-10  |

**Reference:**

1. *Green Chem* 2015, **17**, 4848-4848.
